# Supplementary material
Source: publisher site journal article supplement (https://www.dovepress.com/article/359539)
Supplement: Supplementary file 1 [file get_supplementary_file.php]

**Appendix 1**

**Survey**

Current Age (years):

Gender (M/F):

1. Have you had a Bone Marrow/Stem Cell Transplant from a donor (not yourself)?
   1. YES, when (approximate year) ______
   2. NO- (END SURVEY)
2. Have you ever been diagnosed with Graft versus Host Disease in your eyes (ocular GVHD)
   1. YES, when diagnosed (approximate year) _______
   2. NO
3. Have you ever been diagnosed with GVHD anywhere in your body (other than your eyes)?
   1. YES, when diagnosed (approximate year) _______
   2. NO
4. Do you currently suffer from (or have you ever suffered from) the following eye symptoms (check all the apply)
   1. Vision changes throughout the day
   2. Burning and/or stinging
   3. Gritty and/or dry eyes
   4. Feeling as if something is stuck in the eyes
   5. Eye Pain/Discomfort
   6. Light sensitivity
   7. Sensitivity to wind/airflow
   8. Eye and/or eyelid redness
   9. Excessive tearing
   10. None of the above – END SURVEY
5. When did these symptoms start?
   1. Before the transplant and have remained stable after the transplant
   2. Before the transplant but symptoms worsened after the transplant (IF ANSWER (b) PROCEED TO QUESTION 6)
   3. After the transplant (IF ANSWER (c) PROCEED TO QUESTION 7)
6. Approximately how long after the transplant did your eye symptoms worsen?
   1. 0-6 months
   2. 7-12 months
   3. > 1 year
7. Approximately how long after the transplant did your eye symptoms begin?
   1. 0-6 months
   2. 7-12 months
   3. > 1 year
8. Which of the following treatments have you tried for your symptoms?
   1. Artificial tear drops/lubricant drops
   2. Artificial tear ointment/lubricant ointment/lubricant gel
   3. Restasis or Cequa eye drops
   4. Xiidra eye drops
   5. Steroid eye drops
   6. Serum tears eye drops (from a blood draw)
   7. Punctal plugs
   8. Bandage contact lens
   9. Scleral lenses
   10. Vitamin A ointment (Vita-Pos/Hylo Night, Ocunox)
   11. Lacriserts
   12. Amniotic membrane graft (such as Prokera)
   13. Lid gland expression (such as lipiflow)
   14. Lid gland exfoliation (such as blephex)
   15. Oral doxycycline antibiotic pill
   16. Tarsorrhaphy (sutured lid closure)
   17. None of the above
9. How would you rate your current eye symptoms:
   1. Well controlled
   2. Moderately controlled
   3. Poorly controlled
10. Has a scleral lens or PROSE lens ever been suggested by any of your doctors as a treatment option for you?
    1. Yes
    2. No
11. Check which of the following is true:
    1. I currently wear a scleral lens or PROSE lens (GO TO QUESTION 12,13)
    2. I wore scleral lenses and/or PROSE lens in the past but do not currently (GO TO QUESTION 12,14)
    3. I have never worn a scleral lens or PROSE lens (QUESTION 15)
12. Which of the following are true:
    1. I started wearing a scleral lens or PROSE lens prior to my transplant
    2. I started wearing a scleral lens or PROSE lens after my transplant
13. Wearing scleral lens or PROSE lens has resulted in (check all that apply):
    1. Improved dryness, grittiness
    2. Lessened burning/stinging
    3. Improved pain/discomfort
    4. Improved light sensitivity
    5. Improved redness
    6. Improved vision
    7. Improved sensitivity to wind/airflow
    8. Lessened excessive tearing
    9. Improved overall quality of life
    10. Wish they were recommended sooner
14. I stopped wearing scleral lenses or PROSE lens because (check all the apply)
    1. Uncomfortable
    2. Didn’t help my symptoms
    3. Fogging, mucous build up
    4. Good vision did not last long enough throughout the day
    5. Blurred vision
    6. Cost
    7. Difficult to handle, such as when applying and removing
    8. Too complicated care and maintenance
    9. My condition improved, no longer needed
15. I have never worn a scleral lens or PROSE lens because (check all that apply):
    1. I have never heard of a scleral lens or PROSE lens
    2. Heard of scleral lens/PROSE lens but was never referred for an evaluation
    3. Was referred for a scleral lens/PROSE lens evaluation but never went
    4. Went for a scleral lens/PROSE lens evaluation but ultimately did not get my own lens(es) (due to cost, maintenance issues, uncomfortable trial lens, did not help symptoms, other reason)
